# Supplementary material for: A novel copper(i) metal–organic framework as a highly efficient and ultrasensitive electrochemical platform for detection of Hg(ii) ions in aqueous solution
Source: Royal Society of Chemistry journal article supplement (doi:10.1039/d1ce00197c), 2021-01-01
Supplement: d1ce00197c1.pdf [file d1ce00197c1.pdf]

# A Novel Copper(I) Metal-Organic Framework as a Highly Efficient and Ultrasensitive Electrochemical Platform for Detection of Hg(II) Ion in Aqueous Solution

Xiao-Qing Wang<sup>a\*</sup>, Jing Tang<sup>a</sup>, Xuehui Ma<sup>a</sup>, Dan Wu<sup>a</sup> and Jie Yang<sup>b</sup>

<sup>a</sup> Department of Chemistry, College of Science, North University of China, Taiyuan 030051, PR China

<sup>b</sup> Shandong Provincial Key Laboratory of Chemical Energy Storage and Novel Cell Technology, and School of Chemistry and Chemical Engineering, Liaocheng University, Liaocheng 252000, PR China

**Table S1** Selected bond lengths (Å) and angles (°) of complex **1**.

|                                        |            |                                        |            |
|----------------------------------------|------------|----------------------------------------|------------|
| Cu1—Cu1 <sup>i</sup>                   | 2.801(4)   | Cu1—Cl1                                | 2.441(3)   |
| Cu1—Cl1 <sup>i</sup>                   | 2.441(3)   | Cu1—N1 <sup>ii</sup>                   | 1.977(7)   |
| Cu1—N1                                 | 1.977(7)   | Cu1—Cl3 <sup>iii</sup>                 | 2.437(3)   |
| Cu1—Cl3                                | 2.437(3)   | Cu3—N6                                 | 1.985(9)   |
| Cu3—N5                                 | 1.986(9)   | Cu2—Cl2 <sup>iv</sup>                  | 2.435(3)   |
| Cu2—Cl2                                | 2.435(3)   | Cu2—N3                                 | 1.953(7)   |
| Cu2—N3 <sup>iv</sup>                   | 1.953(7)   | Cu4—Cu4 <sup>v</sup>                   | 2.778(9)   |
| Cu4—Cl4                                | 2.458(7)   | Cu4—Cl4 <sup>v</sup>                   | 2.425(7)   |
| Cu4—N8                                 | 2.054(14)  | Cl1 <sup>i</sup> —Cu1—Cu1 <sup>i</sup> | 54.99(6)   |
| Cl1—Cu1—Cu1 <sup>i</sup>               | 54.99(6)   | Cl1 <sup>i</sup> —Cu1—Cl1              | 109.97(12) |
| N1—Cu1—Cu1 <sup>i</sup>                | 119.8(2)   | N1 <sup>ii</sup> —Cu1—Cu1 <sup>i</sup> | 119.8(2)   |
| N1 <sup>ii</sup> —Cu1—Cl1 <sup>i</sup> | 106.54(13) | N1—Cu1—Cl1                             | 106.54(13) |
| N1—Cu1—Cl1 <sup>i</sup>                | 106.54(13) | N1 <sup>ii</sup> —Cu1—Cl1              | 106.54(13) |
| N1 <sup>ii</sup> —Cu1—N1               | 120.5(5)   | Cl3—Cu3—Cl3 <sup>iii</sup>             | 94.02(12)  |
| N6—Cu3—Cl3 <sup>iii</sup>              | 108.19(18) | N6—Cu3—Cl3                             | 108.19(18) |
| N5—Cu3—Cl3 <sup>iii</sup>              | 110.35(19) | N5—Cu3—Cl3                             | 110.35(19) |

|                                        |            |                                         |            |
|----------------------------------------|------------|-----------------------------------------|------------|
| N5—Cu3—N6                              | 122.1(4)   | Cl2 <sup>iv</sup> —Cu2—Cl2              | 93.58(13)  |
| N3—Cu2—Cl2 <sup>iv</sup>               | 109.04(2)  | N3 <sup>iv</sup> —Cu2—Cl2               | 109.04(2)  |
| N3—Cu2—Cl2                             | 111.05(19) | N3 <sup>iv</sup> —Cu2—Cl2 <sup>iv</sup> | 111.05(19) |
| N3—Cu2—N3 <sup>iv</sup>                | 120.0(5)   | Cl4—Cu4—Cu4 <sup>v</sup>                | 57.44(18)  |
| Cl4 <sup>v</sup> —Cu4—Cu4 <sup>v</sup> | 55.88(18)  | Cl4 <sup>v</sup> —Cu4—Cl4               | 110.6(2)   |
| N8—Cu4—Cu4 <sup>v</sup>                | 120.4(5)   | N8—Cu4—Cl4 <sup>v</sup>                 | 106.4(4)   |
| N8—Cu4—Cl4                             | 107.0(4)   | Cu4 <sup>v</sup> —Cl4—Cu4               | 69.3(2)    |
| Cu1—Cl1—Cu1 <sup>i</sup>               | 70.03(12)  | Cu3—Cl3—Cu3 <sup>vi</sup>               | 85.89(12)  |
| Cu2 <sup>vii</sup> —Cl2—Cu2            | 86.42(13)  | C14—N8—Cu4                              | 124.0(10)  |
| C12—N6—Cu3                             | 131.9(8)   | C10—N6—Cu3                              | 123.7(8)   |
| C16—N3—Cu2                             | 130.0(7)   | C5—N3—Cu2                               | 124.6(6)   |
| C9—N5—Cu3                              | 129.5(9)   | C8—N5—Cu3                               | 127.1(9)   |
| Cl1 <sup>vi</sup> —N1—Cu1              | 121.9(4)   | C1—N1—Cu1                               | 121.9(4)   |

Symmetry codes: (i) 1-x,-y,-z; (ii) +x,-y,-z; (iii) 1-x,+y,+z; (iv) 1/2-x,1/2-y,+z; (v) 3/2-x,-y,1/2-z; (vi) +x, +y,-z.

**Table S2** Bond valence sum calculations for Cu ions based on the crystal data in complex **1**.

| central ion | Bond type              | $r_{ij}/\text{Å}$ | $S_{ij}$ | $V_{ij}$ |
|-------------|------------------------|-------------------|----------|----------|
| Cu1         | Cu1-Cl1                | 2.441             | 0.3028   | 1.096    |
|             | Cu1—Cl1 <sup>i</sup>   | 2.441             | 0.3028   |          |
|             | Cu1—N1                 | 1.977             | 0.4899   |          |
|             | Cu1—N1 <sup>ii</sup>   | 1.977             | 0.4899   |          |
| Cu2         | Cu2—Cl2                | 2.435             | 0.3078   | 1.138    |
|             | Cu2—Cl2 <sup>iv</sup>  | 2.435             | 0.3078   |          |
|             | Cu2—N3                 | 1.953             | 0.5227   |          |
|             | Cu2—N3 <sup>iv</sup>   | 1.953             | 0.5227   |          |
| Cu3         | Cu3—Cl3                | 2.437             | 0.3061   | 1.092    |
|             | Cu3—Cl3 <sup>iii</sup> | 2.437             | 0.3061   |          |
|             | Cu3—N6                 | 1.985             | 0.4794   |          |
|             | Cu3—N5                 | 1.986             | 0.4794   |          |
| Cu4         | Cu4—Cl4                | 2.458             | 0.2892   | 1.003    |

|                      |       |        |
|----------------------|-------|--------|
| Cu4—Cl4 <sup>v</sup> | 2.425 | 0.3162 |
| Cu4—N8               | 2.054 | 0.3979 |
| Cu4—N8 <sup>v</sup>  | 2.054 | 0.3979 |

Symmetry codes: (i) 1-x,-y,-z; (ii) +x,-y,-z; (iii) 1-x,+y,+z; (iv) 1/2-x,1/2-y,+z; (v) 3/2-x,-y,1/2-z; (vi) +x, +y,-z.

**Table S3. Comparison of reported MOF-based sensors for Hg(II) detection.**

|    | MOF                                                                                                    | Methods | Linear Range           | Detection Limit    | Ref.      |
|----|--------------------------------------------------------------------------------------------------------|---------|------------------------|--------------------|-----------|
| 1  | AB/Cu <sub>5</sub> Cl <sub>3</sub> (bimpy) <sub>3</sub> /GCE                                           |         | 2 μM – 64 μM           | 1.1 nM             | This work |
| 2  | NiCo <sub>2</sub> O <sub>4</sub> nanoplatelets/GCE                                                     |         | 0.8 - 2.0 μM           | 42.9 nM            | 28a       |
| 3  | MnFe <sub>2</sub> O <sub>4</sub> @Cys/GCE                                                              |         | 1.4 - 3.0 μM           | 208 nM             | 28b       |
| 4  | GA-UiO-66-NH <sub>2</sub> /GCE                                                                         |         | 0.005 -3.0 μM          | 2 nM               | 13        |
| 5  | 3 D (Co, Mn) <sub>3</sub> O <sub>4</sub> /Ni composite foam                                            |         | 0.5 - 4.0 μM           | 13 nM              | 28c       |
| 6  | Cu-MOFs                                                                                                | ESC     | 10 fM - 100 nM         | 4.8 fM             | 24a       |
| 7  | ssDNA/Au electrode                                                                                     |         | 0.1 - 2.0 μM           | 100 nM             | 29a       |
| 8  | Gold ultramicroelectrode arrays                                                                        |         | 0.01 - 1.0 μM          | 16 nM              | 29b       |
| 10 | Fe <sub>3</sub> O <sub>4</sub> -chitosan/GCE                                                           |         | 0.4 - 1.1 μM           | 95.7 nM            | 29c       |
| 11 | NiCo <sub>2</sub> O <sub>4</sub> /Ni foam                                                              |         | 0.8 - 2.8 μM           | 9.91 nM            | 29d       |
| 12 | PCN-221                                                                                                |         | 50 - 1000 μM           | 0.12 μM            | 30a       |
| 13 | [Pb <sub>2</sub> (2-NCP) <sub>2</sub> (L <sub>1</sub> ) <sub>n</sub>                                   |         | 0 - 1.0 mM             | 10 <sup>-7</sup> M | 30b       |
| 14 | {[Co <sub>2</sub> (L)(hfpd)(H <sub>2</sub> O)]·1.75H <sub>2</sub> O} <sub>n</sub>                      |         | 0 - 200 μM             | 4 μM               | 30c       |
| 15 | [Co(NPDC)(bpee)]·DMF·2H <sub>2</sub> O                                                                 |         | 0 - 120 μM             | 4.1 μM             | 30d       |
| 16 | [Zn(H <sub>4</sub> L)(2,2'-biim)]                                                                      | FL      | 0 - 25 μM              | 0.53 μM            | 31a       |
| 17 | {[Tb <sub>2</sub> (bpda) <sub>3</sub> (H <sub>2</sub> O) <sub>3</sub> ]·H <sub>2</sub> O} <sub>n</sub> |         | 0 - 10 <sup>-3</sup> M | 7.2 nM             | 31b       |
| 18 | {[Mn <sub>2</sub> (Bript) <sub>2</sub> (4,4'-bpy) <sub>5</sub> (DMF)]·(H <sub>2</sub> O) <sub>n</sub>  |         | 0 - 0.3 M              | 48 μM              | 31c       |
| 19 | UiO-66-PSM                                                                                             |         | 0 - 78.1 μM            | 5.88 μM            | 31d       |
| 20 | ZnAPA                                                                                                  |         | 0 - 400 μM             | 0.1243 μM          | 31e       |

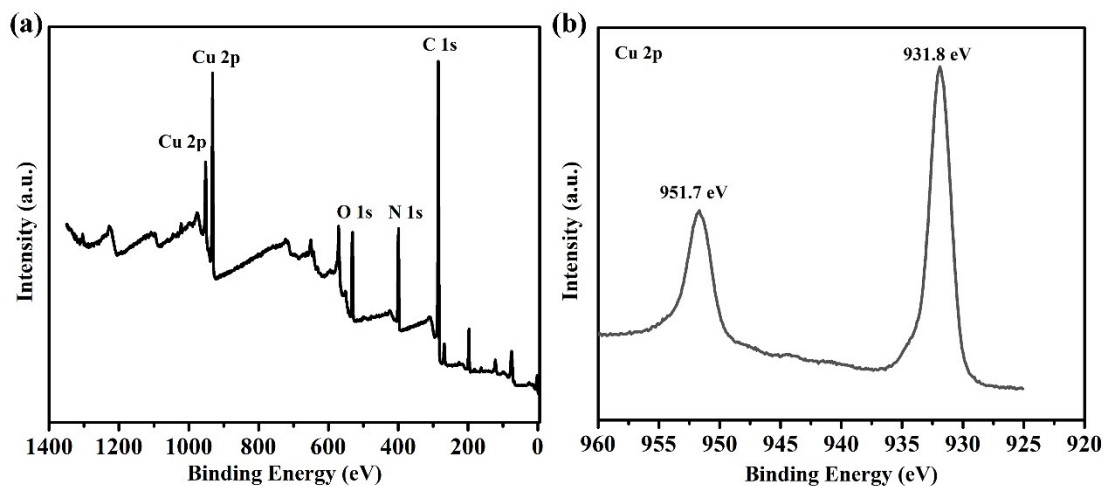

Fig. S1 (a) XPS spectra of complex 1; (b) XPS spectra of Cu 2p of complex 1.

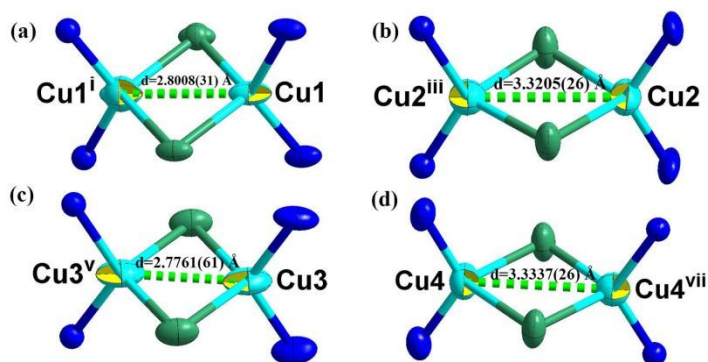

Fig. S2 The SBUs in complex 1.

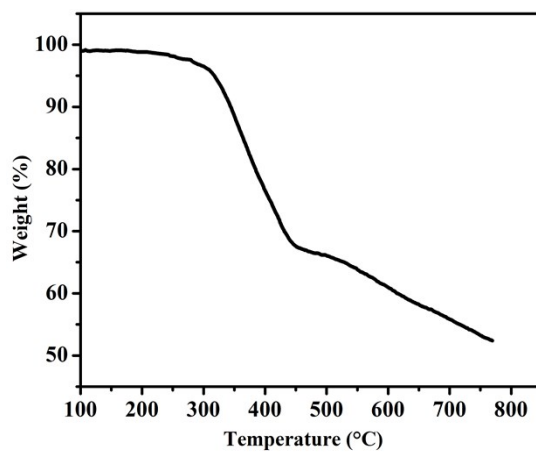

Fig. S3 TGA pattern of complex 1.

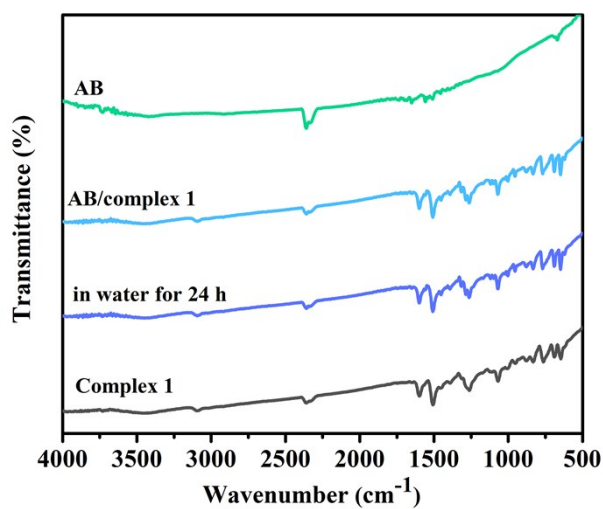

Fig. S4 FTIR spectra of complex 1, 1 after soaking in water for 24 h, AB and AB/complex 1.

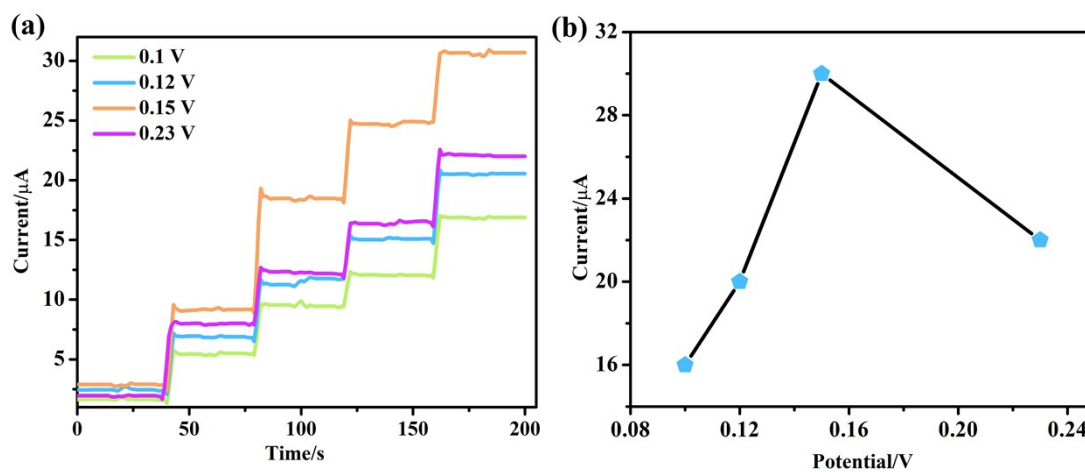

Fig. S5 (a) Chronoamperometric responses of AB/Complex 1/GCE at different potential (0.1, 0.12, 0.15, 0.23 V) with addition of 50 μL Hg<sup>2+</sup> in 0.1 M PBS solution, (b) The current intensity vs. potential.

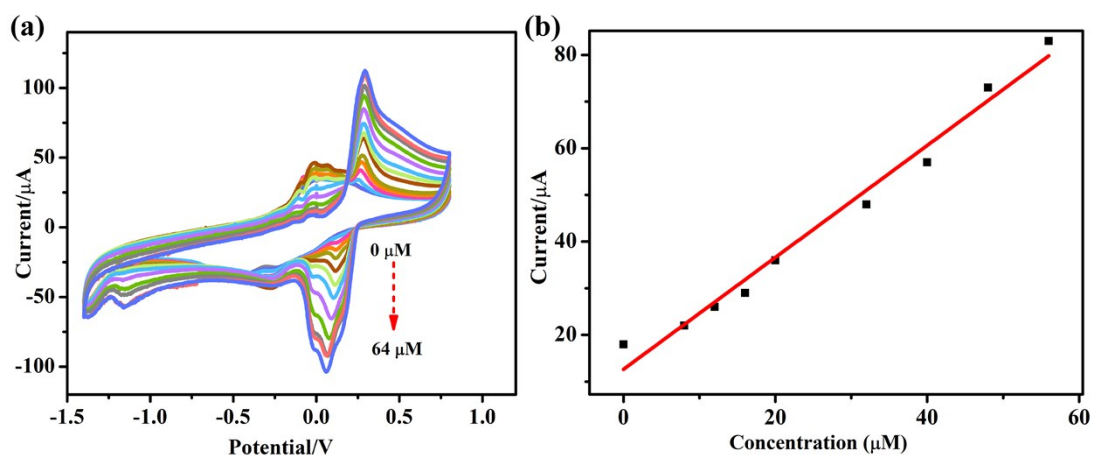

**Fig. S6** (a) CV responses of AB/complex 1/GCE upon successive addition of  $\text{Hg}^{2+}$  over a concentration range of 0  $\mu\text{M}$  to 64  $\mu\text{M}$  in PBS solution; (b) The corresponding calibration plot of current vs. the concentrations of  $\text{Hg}^{2+}$ .

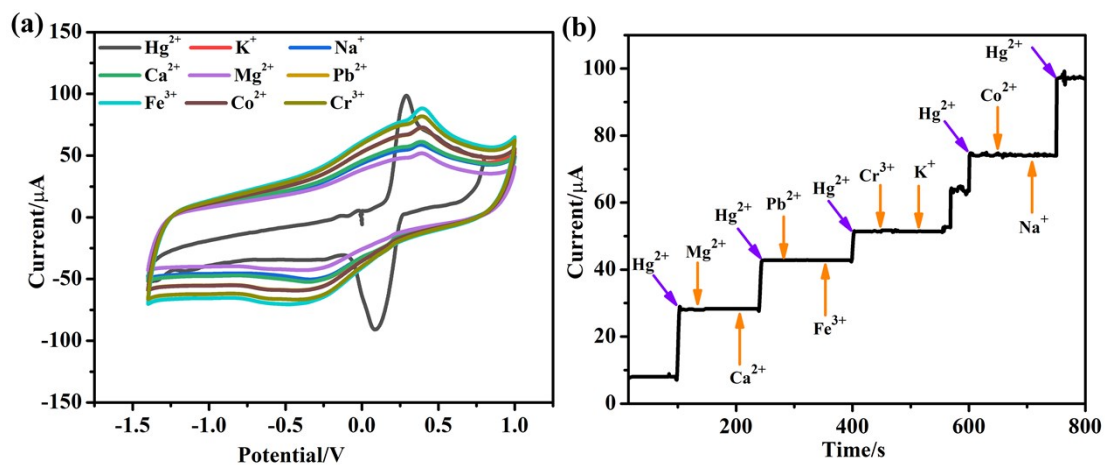

**Fig. S7** (a) CV curves of other metal ions for AB/complex 1/GCE; (b) The specificity of the sensor toward  $\text{Hg}^{2+}$  against different metal ions (the concentration of each interfering ion is 0.01 M).

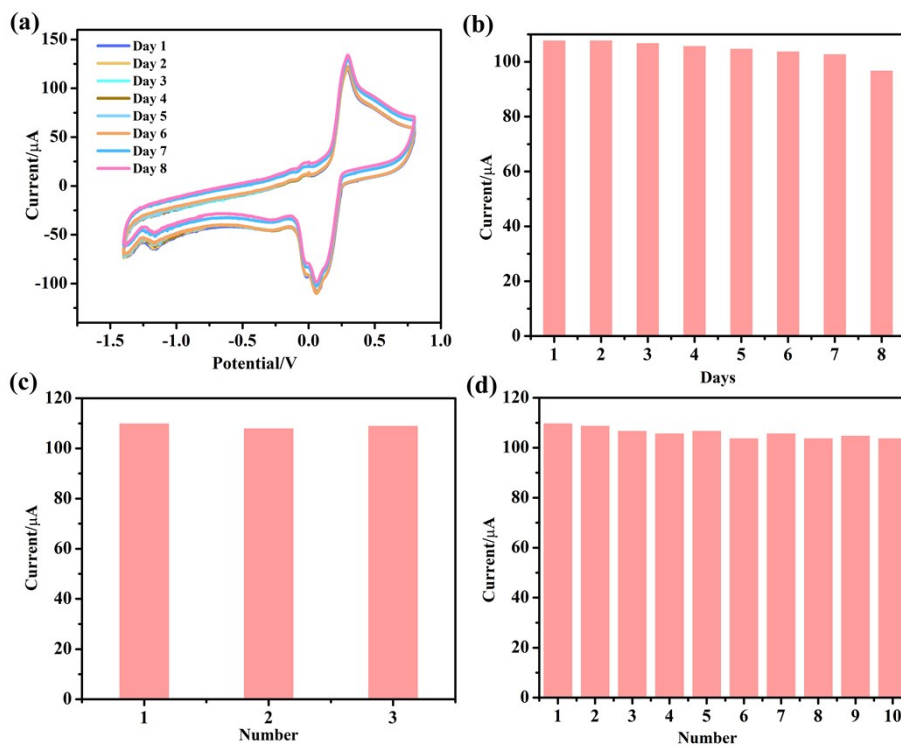

**Fig. S8** (a) The CV response on the sensor for 0.064 mM  $\text{Hg}^{2+}$  analysis after eight days; (b) The current intensity after eight days; (c) The current responses of three different AB/complex 1/GCE sensors at the same condition in 0.1 M PBS containing 0.064 mM  $\text{Hg}^{2+}$ ; (d) The current responses of the same AB/complex 1/GCE sensor for ten replicate experiments in 0.1 M PBS containing 0.064 mM  $\text{Hg}^{2+}$ .
